# Supplementary material
Source: publisher figshare collection journal article supplement (https://tandf.figshare.com/ndownloader/files/12459443)
Supplement: Supplementary file 1 [file 12459443]

# Statistics in Biopharmaceutical Research

A PUBLICATION OF THE AMERICAN STATISTICAL ASSOCIATION

## ASA COPYRIGHT TRANSFER FORM

(1) Accepted manuscripts cannot be published unless this form is completed, signed, and uploaded along with the manuscript's source files (preferred) or sent to Laura Mitchell, Production Editor, *SBR*, Taylor and Francis, 530 Walnut Street, Suite 850, Philadelphia, PA 19106, Fax: 215-207-0047, E-mail: [laura.mitchell@taylorandfrancis.com](mailto:laura.mitchell@taylorandfrancis.com).

(2) Fill in Part A of this form. Sign either Part B or Part C. **NOTE:** The Corresponding Author will sign Part B or Part C on behalf of all authors.

### PART A—Manuscript Information

Title of Manuscript: TESTING STRATEGY WITH ADAPTIVE DOSE SELECTION AND TWO  
Author(s): EKKEHARD GLIMM, MAURITZ BEZUIDENHOUT, A. CAPUTO, W. MAURER ENDPOINTS  
Corresponding Author: EKKEHARD GLIMM Phone No.: +41 61 324 0173

### PART B—Copyright Transfer

**NOTE:** Please do not substitute company or other forms for this form. If your manuscript was prepared as part of your job, the form must be signed by an authorized representative of your employer. U.S. government employees whose work is not subject to copyright should sign Part C.

Whereas the American Statistical Association (ASA) desires to publish the manuscript named above in *Statistics in Biopharmaceutical Research*, the undersigned, as the owner of the copyright in this work, hereby grants and assigns exclusively to ASA all rights, title, and interest in and to the above manuscript now or hereafter protected by the copyright laws of the United States and all foreign countries, including, but not limited to, the right to prepare derivative works and the right to publish, reproduce, lease, copy, and distribute the manuscript (in all forms and all media, whether known at this time or developed at any time in the future), and to sell the manuscript, extracts, or excerpts in its own name in any language without limitation as to territory. In return for this assignment of copyright, ASA grants to the undersigned the right to reproduce the manuscript separately and in any book of which the undersigned is author or editor, subject only to giving written acknowledgment on the manuscript and in the book of the original publication of the manuscript by ASA. ASA also grants to the undersigned the right to place the submitted, author-prepared version (preprint, prior to peer review) of the manuscript on his/her own home page, on the intranet or institutional repository of the author's institution or company, provided there is acknowledgment of submission and a link to the official journal site. The final, accepted, author-prepared version may be posted in all places listed 12 months after publication in the journal. In addition, authors may also use the publisher-supplied PDF for posting in e-reserves, so long as it is also only within the author's institution.

Through signature below, the undersigned (1) signifies acceptance of the terms and conditions above and (2) guarantees that all or any portion of the manuscript named above has not been published previously elsewhere or infringes any copyright, violates any property rights, or contains any scandalous, libelous, or unlawful matter. If all or any part of the manuscript has been published previously, the undersigned affirms that the previous publisher no longer has any publication rights or any other rights in or to the work.

Signature:  Date Form Signed: 1 June 2018

Signer's Title and Relationship to Author (i.e., Employer) If Not Author: \_\_\_\_\_

### PART C—U.S. Government Employee Certification

(NOTE: If the manuscript was prepared under a U.S. government contract, sign Part B.)

The undersigned certifies that he/she prepared the above manuscript as an employee of the U.S. government and prepared this work as part of his/her employment and that the manuscript is therefore not subject to U.S. copyright protection.

Signature: \_\_\_\_\_ Date Form Signed: \_\_\_\_\_  
(rev. 3/14)
